# Supplementary material for: Prediction of cognitive decline in older breast cancer survivors: the Thinking and Living with Cancer study
Source: PubMed Central journal article supplement — JNCI Cancer Spectr. 2024 Apr 1;8(2):pkae019. doi: 10.1093/jncics/pkae019 (PMC11031271; doi:10.1093/jncics/pkae019), 2024-04-01
Supplement: pkae019_supplementary_data.pdf [file pkae019_supplementary_data.pdf]

# Supplementary Materials

## Supplementary Methods

**Cross Validation:** We used a k-fold cross-validation for LASSO hyperparameter tuning and other model optimization, a common procedure in machine learning to reduce overfitting. After assessing each cross-validation, we chose four-fold cross-validation which led to the most parsimonious set of predictors, which were also consistent with those selected in other machine learning approaches. As such, our analytic sample of 228 survivors was split into 4 equal sized “folds” of 57. The average error and standard deviation over the folds for a sequence of penalty parameter values are computed and we select the penalty parameter value that yields the minimum cross-validated error for the final LASSO model.

**Attention, processing speed, and executive functioning (APE):** Attention, processing speed, and executive functioning (APE) measure consists of following 6 tests;

1. Digits Forward - Number of sequences correctly recalled;
2. Digits Backward - Number of sequences correctly recalled;
3. Trail Making A - Time in seconds;
4. Trail Making B - Time in seconds;
5. Controlled Oral Word Association Test (COWAT) - Number of words given in allowed time;
6. Digit Symbol Test raw score - Number of symbols produced in allowed time.

**Supplementary Figure 1.** Heatmap showing the correlation between each variable included in the analysis. For comparison of two nominal variables, bias corrected Cramer’s V statistic was computed. For the comparison of two numeric variables, association was measured as the absolute value of the Pearson’s correlation coefficient. Red indicates positive correlation and blue indicates negative correlation. Measures from the same test (e.g. FACIT) are highly correlated, as are multiple categorizations (different cut-offs) of the same outcome measure. Additionally, we observe a correlation between various comorbidities, particularly cardiovascular comorbidities, and certain medications.

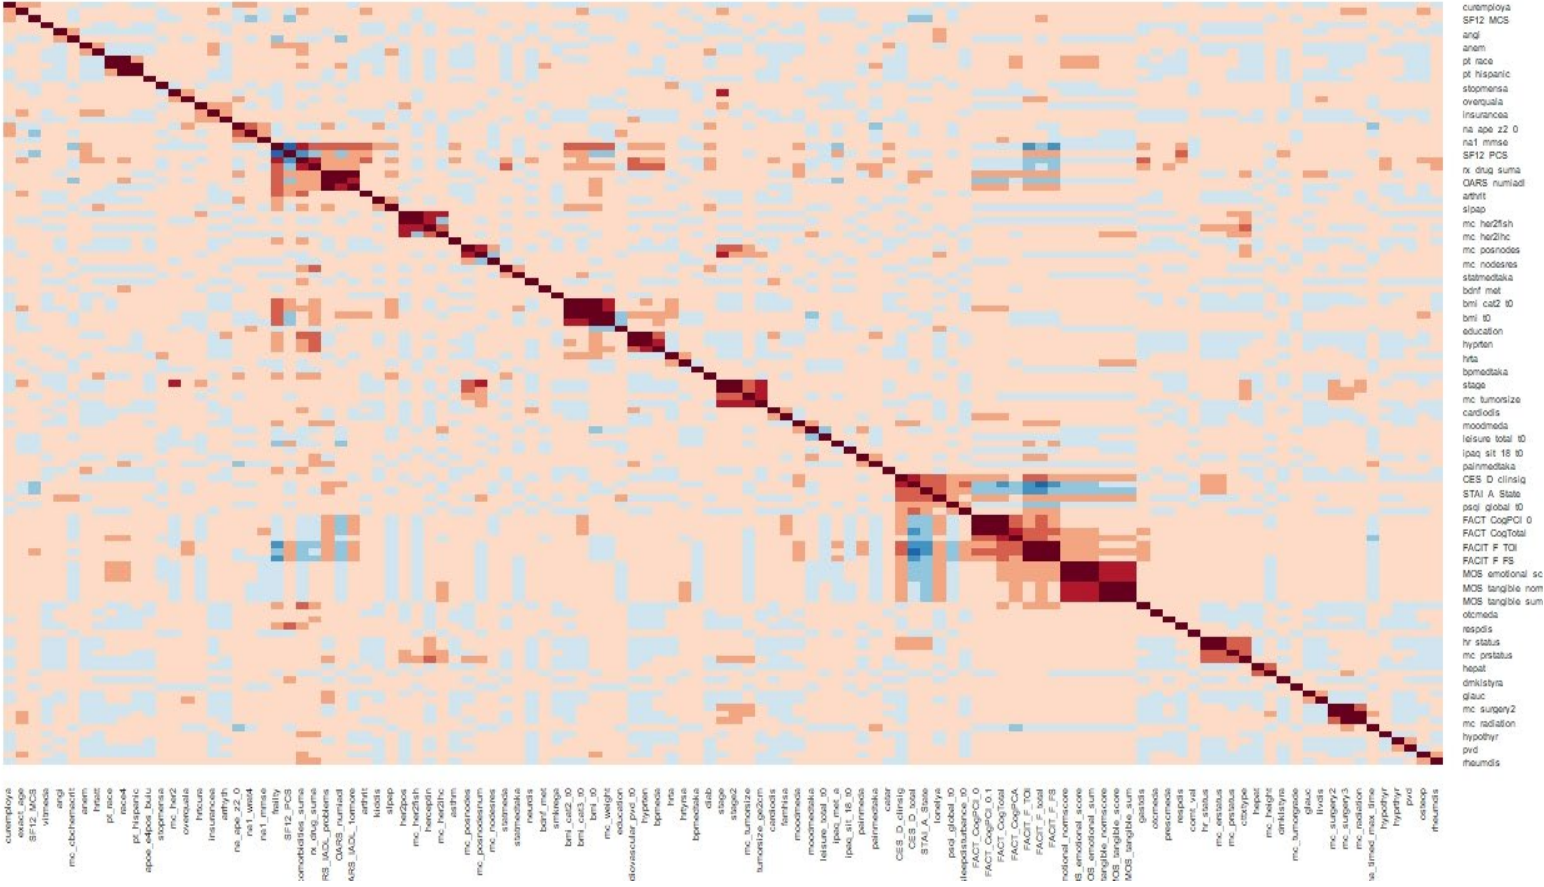

**Supplementary Table 1**

| Variable Summary                                                                          | Min  | Max   | Percent Missing | Type of variable |
|-------------------------------------------------------------------------------------------|------|-------|-----------------|------------------|
| <b>Key Predictors (breast cancer related variables)</b>                                   |      |       |                 |                  |
| Treatment Type (Chemotherapy with or without hormonal therapy vs. hormonal therapy alone) | 1    | 2     | 0%              | Binary           |
| Hormonal Replacement Therapy Use (Yes/No)                                                 | 0    | 1     | 0%              | Binary           |
| Currently Using Hormonal Replacement Therapy (Yes/No)                                     | 0    | 1     | 48%             | Binary           |
| Years of Past Menopausal Hormonal Therapy Use                                             | 1    | 5     | 49%             | Continuous       |
| Estrogen Receptor Status (Positive/Negative)                                              | 1    | 2     | 0.4%            | Binary           |
| Progesterone Receptor Status (Positive/Negative)                                          | 1    | 2     | 0.9%            | Binary           |
| Hormone Receptor Status                                                                   | 0    | 1     | 0.4%            | Binary           |
| Positive Nodes (Yes/No)                                                                   | 0    | 1     | 0.4%            | Binary           |
| Nodes Resected (Yes/No)                                                                   | 0    | 1     | 88%             | Binary           |
| Number of Positive Nodes                                                                  | 0    | 15    | 0.4%            | Continuous       |
| Tumor Grade (Poor/Moderate/Well)                                                          | 1    | 3     | 16%             | Categorical      |
| Tumor Size                                                                                | 0.1  | 12    | 2%              | Continuous       |
| Tumor Size Greater Than or Equal to 2cm (Yes/No)                                          | 0    | 1     | 2%              | Binary           |
| Radiation (Yes/No)                                                                        | 0    | 1     | 0%              | Binary           |
| Stage (DCIS/I/II/III/IV)                                                                  | 0    | 3     | 0%              | Categorical      |
| Categorical Stage Factor (0-1/2-3)                                                        | 1    | 2     | 0%              | Binary           |
| Surgery (BCS/Mastectomy)                                                                  | 1    | 2     | 0.4%            | Binary           |
| Surgery and Radiotherapy (BCS Only/BCS with Radiation/Mastectomy)                         | 1    | 3     | 0.4%            | Categorical      |
| Herceptin                                                                                 | 0    | 1     | 0%              | Binary           |
| APOE E4 Positivity                                                                        | 0    | 1     | 4.4%            | Binary           |
| HER2 Positivity                                                                           | 0    | 1     | 4.4%            | Binary           |
| <b>Non-Cancer Clinical Variables (medicine, comorbidity, frailty)</b>                     |      |       |                 |                  |
| Age at Menopause                                                                          | 23   | 63    | 3.1%            | Continuous       |
| Smoke Regularly (Currently/Used to/Never)                                                 | 0    | 2     | 1%              | Categorical      |
| Drank Alcoholic Beverages in Last Year (Yes/No)                                           | 0    | 1     | 6.1%            | Binary           |
| Family History of Dementia or Cognitive Decline (Yes/No)                                  | 0    | 1     | 0%              | Binary           |
| Regularly Take Statin Medication (Yes/No)                                                 | 0    | 1     | 0%              | Binary           |
| Took Statin Medication Yesterday or Today (Yes/No)                                        | 0    | 1     | 65%             | Binary           |
| Regularly Take Medication for Mood or Nerves (Yes/No)                                     | 0    | 1     | 0%              | Binary           |
| Took Medication for Mood or Nerves Yesterday or Today (Yes/No)                            | 0    | 1     | 81%             | Binary           |
| Regularly Take Blood Pressure Medication (Yes/No)                                         | 0    | 1     | 0.9%            | Binary           |
| Took Blood Pressure Medication Yesterday or Today (Yes/No)                                | 0    | 1     | 65%             | Binary           |
| Regularly Take Pain Medication (Yes/No)                                                   | 0    | 1     | 0.4%            | Binary           |
| Took Pain Medication Yesterday or Today (Yes/No)                                          | 0    | 1     | 81%             | Binary           |
| Regularly Take Other Prescription Medication (Yes/No)                                     | 0    | 1     | 1%              | Binary           |
| Regularly Take Over the Counter Medication (Yes/No)                                       | 0    | 1     | 0.4%            | Binary           |
| Regularly Take Multivitamins (Yes/No)                                                     | 0    | 1     | 3%              | Binary           |
| Sum of Number of Prescription Drugs                                                       | 0    | 11    | 0%              | Continuous       |
| Height                                                                                    | 0.6  | 167   | 15%             | Continuous       |
| Weight                                                                                    | 4    | 360   | 15%             | Continuous       |
| Hematocrit                                                                                | 27.4 | 363.7 | 21%             | Continuous       |

|                                                                                            |      |      |       |             |
|--------------------------------------------------------------------------------------------|------|------|-------|-------------|
| BDNF                                                                                       | 0    | 1    | 33%   | Binary      |
| COMT                                                                                       | 0    | 1    | 34%   | Binary      |
| Frailty                                                                                    | 0    | 0.4  | 0%    | Continuous  |
| Angina In Last 6 Months                                                                    | 0    | 1    | 0%    | Binary      |
| Arrhythmia In Last 6 Months                                                                | 0    | 1    | 2%    | Binary      |
| Congestive Heart Failure In Last 6 Months                                                  | 0    | 0    | 0%    | Binary      |
| Hypertension In Last 6 Months                                                              | 0    | 1    | 0.4%  | Binary      |
| Heart Attack In Last 6 Months                                                              | 0    | 1    | 0%    | Binary      |
| Other Cardiovascular Disease In Last 6 Months                                              | 0    | 1    | 0.4%  | Binary      |
| Asthma In Last 6 Months                                                                    | 0    | 1    | 0%    | Binary      |
| Other Respiratory Disease In Last 6 Months                                                 | 0    | 1    | 0.4%  | Binary      |
| Arthritis In Last 6 Months                                                                 | 0    | 1    | 1%    | Binary      |
| Other Rheumatological Disease In Last 6 Months                                             | 0    | 1    | 1%    | Binary      |
| Hip Fracture In Last 6 Months                                                              | 0    | 0    | 0.4%  | Binary      |
| Osteoporosis In Last 6 Months                                                              | 0    | 1    | 1%    | Binary      |
| Cataracts In Last 6 Months                                                                 | 0    | 1    | 1%    | Binary      |
| Glaucoma In Last 6 Months                                                                  | 0    | 1    | 0%    | Binary      |
| Other Gastrointestinal Disease In Last 6 Months                                            | 0    | 1    | 0%    | Binary      |
| Hepatitis In Last 6 Months                                                                 | 0    | 1    | 0.40% | Binary      |
| Other Liver Disease In Last 6 Months                                                       | 0    | 1    | 0%    | Binary      |
| Other Kidney In Last 6 Months                                                              | 0    | 1    | 0.4%  | Binary      |
| Hyperthyroidism In Last 6 Months                                                           | 0    | 1    | 0%    | Binary      |
| Hypothyroidism In Last 6 Months                                                            | 0    | 1    | 0%    | Binary      |
| Peripheral Vascular Disease In Last 6 Months                                               | 0    | 1    | 0.4%  | Binary      |
| Anemia In Last 6 Months                                                                    | 0    | 1    | 1%    | Binary      |
| Other Neurological Disease In Last 6 Months                                                | 0    | 1    | 1%    | Binary      |
| Diabetes In Last 6 Months                                                                  | 0    | 1    | 0.4%  | Binary      |
| Sleep Apnea In Last 6 Months                                                               | 0    | 1    | 66%   | Binary      |
| Sum of Comorbidities In Last 6 Months                                                      | 0    | 8    | 0%    | Continuous  |
| Cardiovascular Comorbidities In Last 6 Months                                              | 0    | 1    | 0%    | Binary      |
| BMI Baseline                                                                               | 16.8 | 61.8 | 0%    | Continuous  |
| Obesity Baseline (BMI <30 Not Obese/BMI >30 Obese)                                         | 1    | 2    | 0%    | Binary      |
| Obesity Baseline (BMI <30 Not Obese/BMI 30-<35 Low Risk Obese/BMI >35 High Risk Obese)     | 1    | 3    | 0%    | Categorical |
| <b>Socio-Demographics</b>                                                                  |      |      |       |             |
| Age                                                                                        | 60   | 91.1 | 0.4%  | Continuous  |
| Patient Race (White/Black or African American/Other)                                       | 1    | 3    | 0%    | Categorical |
| Hispanic (Yes/No)                                                                          | 0    | 1    | 0%    | Binary      |
| Education (In Years)                                                                       | 10   | 18   | 0%    | Continuous  |
| Current Employment Status (Employed/Not Employed)                                          | 1    | 2    | 0%    | Binary      |
| Insurance (Private/Medicaid/Medicare/Uninsured)                                            | 1    | 4    | 1%    | Categorical |
| <b>Survey &amp; Evaluation Based (cognition, depression, anxiety, emotional, and etc.)</b> |      |      |       |             |
| MMSE                                                                                       | 24   | 30   | 0%    | Continuous  |

|                                                                                                       |      |      |      |             |
|-------------------------------------------------------------------------------------------------------|------|------|------|-------------|
| WRAT4 Word Reading                                                                                    | 37   | 70   | 0.4% | Continuous  |
| MMSE                                                                                                  | 24   | 30   | 0%   | Continuous  |
| WRAT4 Word Reading                                                                                    | 37   | 70   | 0.4% | Continuous  |
| Reported Sleep Disturbance (Yes/No)                                                                   | 0    | 1    | 0%   | Binary      |
| Felt Lonely in Past Week (Rarely/Some or Little/Moderate/Most of the time)                            | 1    | 4    | 1%   | Categorical |
| IPAQ Average Daily Sedentary Time                                                                     | 1    | 18   | 8%   | Continuous  |
| IPAQ Average METS per Week                                                                            | 0    | 0.9  | 11%  | Continuous  |
| Timed Up & Go Max Seconds                                                                             | 7.3  | 24.7 | 7%   | Continuous  |
| Total Number of Leisure Activities (0-11)                                                             | 2    | 11   | 0%   | Continuous  |
| SF12 Mental Component Score                                                                           | 38.8 | 68.7 | 4%   | Continuous  |
| SF12 Physical Component Score                                                                         | 20.6 | 59.9 | 4%   | Continuous  |
| FACT Cog PCI sub-scale                                                                                | 20   | 72   | 0%   | Continuous  |
| FACT Cog PCA sub-scale                                                                                | 5    | 28   | 0%   | Continuous  |
| FACT Cog Total                                                                                        | 46   | 148  | 0.4% | Continuous  |
| MOS Emotional Support Score                                                                           | 1.9  | 5    | 3%   | Continuous  |
| MOS Emotional Support Normalized Score                                                                | 21.9 | 100  | 3%   | Continuous  |
| MOS Emotional Support Sum                                                                             | 15   | 40   | 3%   | Continuous  |
| MOS Tangible Support Score                                                                            | 1.5  | 5    | 3%   | Continuous  |
| MOS Tangible Support Normalized Score                                                                 | 12.5 | 100  | 3%   | Continuous  |
| MOS Tangible Support Sum                                                                              | 6    | 20   | 3%   | Continuous  |
| CES D Total of Items                                                                                  | 0    | 43   | 2%   | Continuous  |
| CES D Clinically Significant Depression ( $\geq 16$ Depressed/ $< 16$ Not Depressed)                  | 0    | 1    | 2%   | Binary      |
| STAI A-Scale State                                                                                    | 22   | 61   | 1%   | Continuous  |
| OARS Instrumental ADL 1 or More Impairments (Yes/No)                                                  | 0    | 1    | 0%   | Binary      |
| OARS Instrumental ADL Impairments (None/Mild/Moderate/Severe)                                         | 0    | 3    | 0%   | Categorical |
| OARS Instrumental ADL Total Impairments                                                               | 0    | 7    | 0%   | Continuous  |
| FACIT-F Fatigue Subscale                                                                              | 7    | 52   | 0.4% | Continuous  |
| FACIT-F Trial Outcome Index                                                                           | 12.3 | 100  | 0.4% | Continuous  |
| FACIT-F Total Score                                                                                   | 42.3 | 136  | 1%   | Continuous  |
| APE Z-Score (NAB Digits Forward, NAB Digits Backward, Trail Making A & B, Digit Symbol Test, & COWAT) | -3.1 | 1.7  | 0%   | Continuous  |

**Supplementary Table 2:** The top 10 influential variables for other machine learning explored in this analysis are recorded for classifying transient and persistent CRCD. For stochastic gradient boosting machines (SGB) the variable importance is determined by calculating the change in squared error, over all trees, when a variable is chosen to split on in the tree building process. For random forest (RF) models, the variable importance is determined by calculating the mean decrease in model accuracy on out of bag samples when a given variable is excluded from the model.

| Table 2A: Influential Variables for Other Machine Learning Models to Predict Transient 12-Month Cognitive Decline |                           |
|-------------------------------------------------------------------------------------------------------------------|---------------------------|
| Stochastic Gradient Boosting (SGB)                                                                                | Random Forest (RF)        |
| BMI Baseline                                                                                                      | APOE E4 Pos               |
| APE Baseline                                                                                                      | BMI Baseline              |
| IPAQ Sitting Hours                                                                                                | FACIT F TOI               |
| APOE E4 Pos                                                                                                       | BMI Obesity (3 Category)  |
| SF12 PCS                                                                                                          | APE Baseline              |
| Age                                                                                                               | IPAQ Sitting Hours        |
| NA Timed – Max                                                                                                    | Regularly Takes Pain Meds |
| FACIT F Total                                                                                                     | STAI A State              |
| IPAQ Met. Avg                                                                                                     | FACIT F FS                |
| SF12 MCS                                                                                                          | Hispanic (Y/N)            |

| Table 2B: Influential Variables for Other Machine Learning Models to Predict Persistent 24-Month Cognitive Decline |                       |
|--------------------------------------------------------------------------------------------------------------------|-----------------------|
| SGB                                                                                                                | RF                    |
| BMI Baseline                                                                                                       | BMI Baseline          |
| SF12 MCS                                                                                                           | CES D Total           |
| IPAQ Sitting Hours                                                                                                 | Sum of Presc. Drugs   |
| Frailty                                                                                                            | BMI Obesity           |
| IPAQ Met Avg                                                                                                       | FACT Cog PCI Baseline |
| FACIT F FS                                                                                                         | FACIT F FS            |
| APE Baseline                                                                                                       | Cataracts             |
| Regularly Take Pain Meds                                                                                           | IPAQ Sitting Hours    |
| NA Timed - Max                                                                                                     | APE Baseline          |
| FACIT F Total                                                                                                      | Frailty               |

**Supplementary Table 3.** LASSO selected Predictors of the Risk of 12-Month Transient Cognitive Decline among Older Women with Breast Cancer<sup>1</sup>

| Model with Baseline APE Domain Score <sup>2</sup>          |                        |                |         |         |
|------------------------------------------------------------|------------------------|----------------|---------|---------|
| Variable                                                   | Regression Coefficient | Standard Error | Z-Value | p-value |
| Intercept                                                  | -1.23                  | 0.50           | -2.46   | 0.01    |
| Treatment Type – Chemo <sup>3</sup>                        | -0.01                  | 0.37           | -0.02   | 0.98    |
| Cardiovascular Disease Comorbidity                         | 0.50                   | 0.36           | 1.37    | 0.17    |
| BMI >30 <sup>4</sup>                                       | -0.73                  | 0.34           | -2.13   | 0.03    |
| ApoE E4 Positivity (vs. E4 negative)                       | 1.28                   | 0.38           | 3.40    | <0. 01  |
| Number of Prescription Drugs Regularly Taken, per one drug | 0.12                   | 0.09           | 1.29    | 0.20    |
| HER2 Positivity (vs. negative)                             | -1.67                  | 0.86           | -1.95   | 0.05    |
| Baseline APE Domain Z-Score                                | 0.85                   | 0.27           | 3.09    | <0.01   |
| Model without Baseline APE Domain Score                    |                        |                |         |         |
| Variable                                                   | Regression Coefficient | Standard Error | Z-Value | p-value |
| Intercept                                                  | -1.15                  | 0.49           | -2.36   | 0.02    |
| Treatment Type – Chemo                                     | -0.02                  | 0.36           | -0.05   | 0.96    |
| Cardiovascular Disease Comorbidity                         | 0.44                   | 0.35           | 1.27    | 0.21    |
| BMI >30                                                    | -0.68                  | 0.33           | -2.05   | 0.04    |
| ApoE E4 Positivity (vs. E4 negative)                       | 1.26                   | 0.37           | 3.43    | <0. 01  |
| Number of Prescription Drugs Regularly Taken, per one drug | 0.10                   | 0.09           | 1.14    | 0.25    |
| HER2 Positivity (vs. negative)                             | -1.40                  | 0.82           | -1.70   | 0.09    |
| Baseline APE Domain Score                                  |                        |                |         |         |

<sup>1</sup>Logistic regression model with least absolute shrinkage and selection operator (LASSO) was used to identify predictors indicative of risk of cognitive decline. 4-fold cross-validation was used during the model optimization of tuning/penalty parameters to obtain the model selected variables and corresponding regression coefficient estimates for the displayed LASSO model outputs. Regression coefficients, standard errors, z-values, and p-values are summarized. The model output in the top panel corresponds to an Area Under the Curve (AUC) of 0.750, while the model without a measure of baseline cognitive reserve (APE domain score) corresponds to an AUC of 0.710.

<sup>2</sup>The APE domain is a summary Z-score of performance on six neuropsychologic tests of attention, processing speed and executive function.

<sup>3</sup>Systemic treatment categories are for chemotherapy with or without endocrine therapy vs. the referent group of endocrine therapy alone.

<sup>4</sup>BMI = weight (kg) / height (m<sup>2</sup>) at baseline

**Supplementary Table 4.** LASSO selected Predictors of the Risk of 24-Month Persistent Cognitive Decline among Older Women with Breast Cancer<sup>1</sup>

| Model with Baseline APE Domain Score <sup>2</sup>          |                        |                |         |         |
|------------------------------------------------------------|------------------------|----------------|---------|---------|
| Variable                                                   | Regression Coefficient | Standard Error | Z-Value | p-value |
| Intercept                                                  | 6.33                   | 2.97           | 2.13    | 0.03    |
| Treatment Type – Chemo <sup>3</sup>                        | -0.28                  | 0.49           | -0.57   | 0.57    |
| Cardiovascular Disease Comorbidity                         | 0.30                   | 0.54           | 0.56    | 0.58    |
| BMI >30 <sup>4</sup>                                       | -0.79                  | 0.45           | -1.74   | 0.08    |
| ApoE E4 Positivity (vs. E4 negative)                       | 0.90                   | 0.50           | 1.80    | 0.07    |
| Number of Prescription Drugs Regularly Taken, per one drug | 0.29                   | 0.12           | 2.32    | 0.02    |
| HER2 Positivity (vs. negative)                             | -0.42                  | 0.96           | -0.44   | 0.66    |
| IPAQ Daily Sitting Hours                                   | -0.15                  | 0.07           | -2.22   | 0.03    |
| SF12 Mental Component Score                                | -0.14                  | 0.05           | -2.79   | 0.01    |
| Baseline APE Domain Score                                  | 0.57                   | 0.36           | 1.58    | 0.11    |
| Baseline Mini Mental Status Exam <sup>5</sup>              |                        |                |         |         |
| Years Of Education                                         |                        |                |         |         |
| Model without Baseline APE Domain Score                    |                        |                |         |         |
| Variable                                                   | Regression Coefficient | Standard Error | Z-Value | p-value |
| Intercept                                                  | 22.66                  | 6.18           | 3.67    | <0.01   |
| Treatment Type – Chemo                                     | -0.54                  | 0.52           | -1.04   | 0.30    |
| Cardiovascular Disease Comorbidity                         | 0.48                   | 0.56           | 0.86    | 0.39    |
| BMI >30                                                    | -0.99                  | 0.47           | -2.09   | 0.04    |
| ApoE E4 Positivity (vs. E4 negative)                       | 0.96                   | 0.52           | 1.83    | 0.07    |
| Number of Prescription Drugs Regularly Taken, per one drug | 0.31                   | 0.13           | 2.33    | 0.02    |
| HER2 Positivity (vs. negative)                             | -0.48                  | 0.93           | -0.51   | 0.61    |
| IPAQ Daily Sitting Hours                                   | -0.15                  | 0.07           | -2.09   | 0.04    |
| SF12 Mental Component Score                                | -0.17                  | 0.05           | -3.38   | <0.01   |
| Baseline APE Domain Score                                  |                        |                |         |         |
| Baseline Mini Mental Status Exam <sup>5</sup>              | -0.59                  | 0.18           | -3.32   | <0.01   |
| Years Of Education                                         | 0.17                   | 0.12           | 1.45    | 0.15    |

<sup>1</sup>Logistic regression model with least absolute shrinkage and selection operator (LASSO) was used to identify predictors indicative of risk of cognitive decline. 4-fold cross-validation was used during the model optimization of tuning/penalty parameters to obtain the model selected variables and corresponding regression coefficient estimates for the displayed LASSO model outputs. Regression coefficients, standard errors, z-values, and p-values are summarized. The model output in the top panel corresponds to an Area Under the Curve (AUC) of 0.788, while the model on the bottom panel with MMSE and Years of Education as a substitute measure of baseline cognitive reserve corresponds to an AUC of 0.832.

<sup>2</sup>The APE domain is a summary Z-score of performance on six neuropsychologic tests of attention, processing speed and executive function.

<sup>3</sup>Systemic treatment categories are for chemotherapy with or without endocrine therapy vs. the referent group of endocrine therapy alone.

<sup>4</sup>BMI = weight (kg) / height (m<sup>2</sup>) at baseline

<sup>5</sup>The Mini Mental Status Exam scores are truncated at >24 based on study eligibility.
